# Supplementary material for: Short-term particulate matter exposure induces extracellular vesicle release in overweight subjects
Source: PubMed Central journal article supplement — Environ Res. 2017 May;155:228–34. doi: 10.1016/j.envres.2017.02.014 (PMC5380126; doi:10.1016/j.envres.2017.02.014), 2017-05

## Figure 1 Supplementary

a,b) Flow cytometry gating strategy to phenotype EVs . [a) for unstained sample; b) stained sample with CFSE and Ab]. EVs displayed on FSC versus SSC plot with cut-off gate for cellular debris; intact EVs displayed (CFSE+) and gated on FITC; FITC-positive EVs then displayed on SSC-APC plots in a (double positive FITC+APC+)

c) Nanosight graph for particle size and concentration of EVs. The curves represent the distribution of EVs in the five sample video recordings of 30''; on the x axis is reported the size (nm) and on the y axis is reported the concentration (n\*E6/ml).

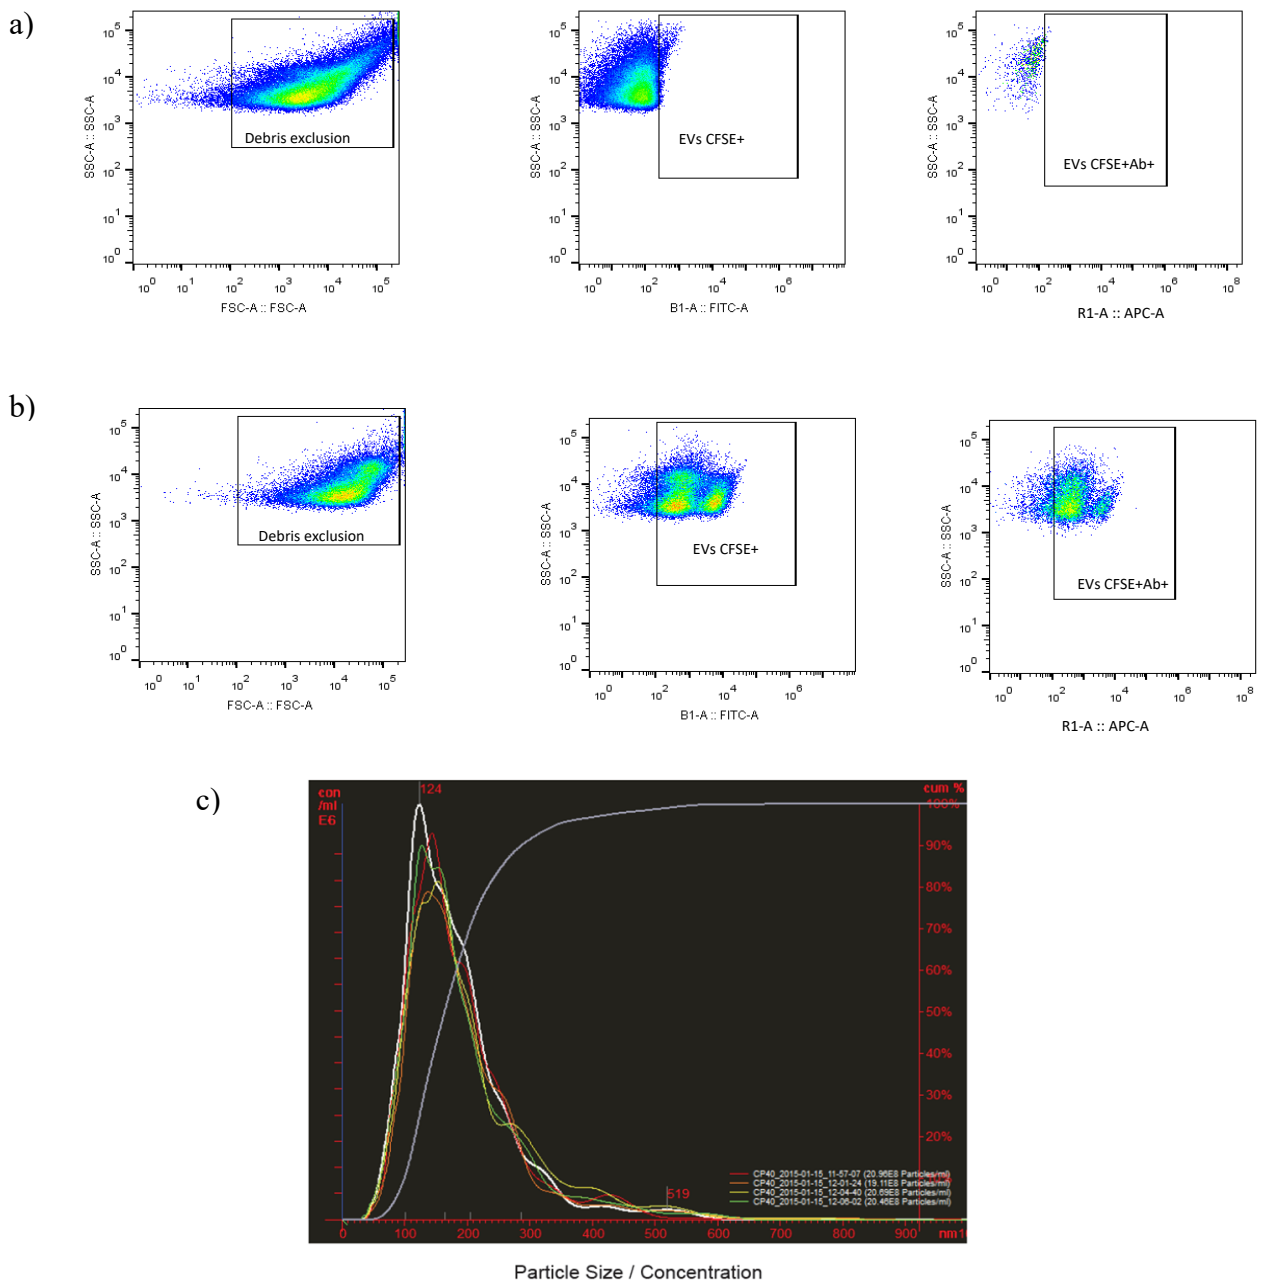

Supplement: mmc1.pdf [file mmc1.pdf]
